# Supplementary material for: Stimuli-Sensitive Polymeric Micelles Formulations Enhance the Cytostatic Effect against the Leukemia Cells via “Aikido” Principle Realization
Source: Preprints.org preprint supplement (doi:10.20944/preprints202402.0157.v1), 2024-02-02
Supplement: Supplementary file 1 [file supplementary]

Disulfide cross-linked polymeric redox-responsive nanocarrier based on heparin, chitosan and lipoic acid improved drug accumulation, increased cytotoxicity and selectivity against leukemia cells by tumor targeting via “Aikido” principle

**Igor D. Zlotnikov 1, Alexander A. Ezhov 2, Natalia V. Dobryakova 1 and Elena V. Kudryashova 1,***

1 Faculty of Chemistry, Lomonosov Moscow State University, Leninskie Gory, 1/3,
119991 Moscow, Russia; zlotnikovid@my.msu.ru (I.D.Z.);

2 Faculty of Physics, Lomonosov Moscow State University, Leninskie Gory, 1/2, 119991 Moscow, Russia; alexander-ezhov@yandex.ru

***** Correspondence: helenakoudriachova@yandex.ru (E.V.K.)

**Figure S1.** FTIR spectra ofChit5, LA, its conjugate Chit5-LA. PBS (0.01 M, pH 7.4). T = 22 °C.





**Figure S2.** Zoomed FTIR spectra ofChit5-LA and DoxMC2 (Dox-SS-LA-Chit5) in the wavenumber region 2650-2450 cm–1. PBS (0.01 M, pH 7.4). T = 22 °C.


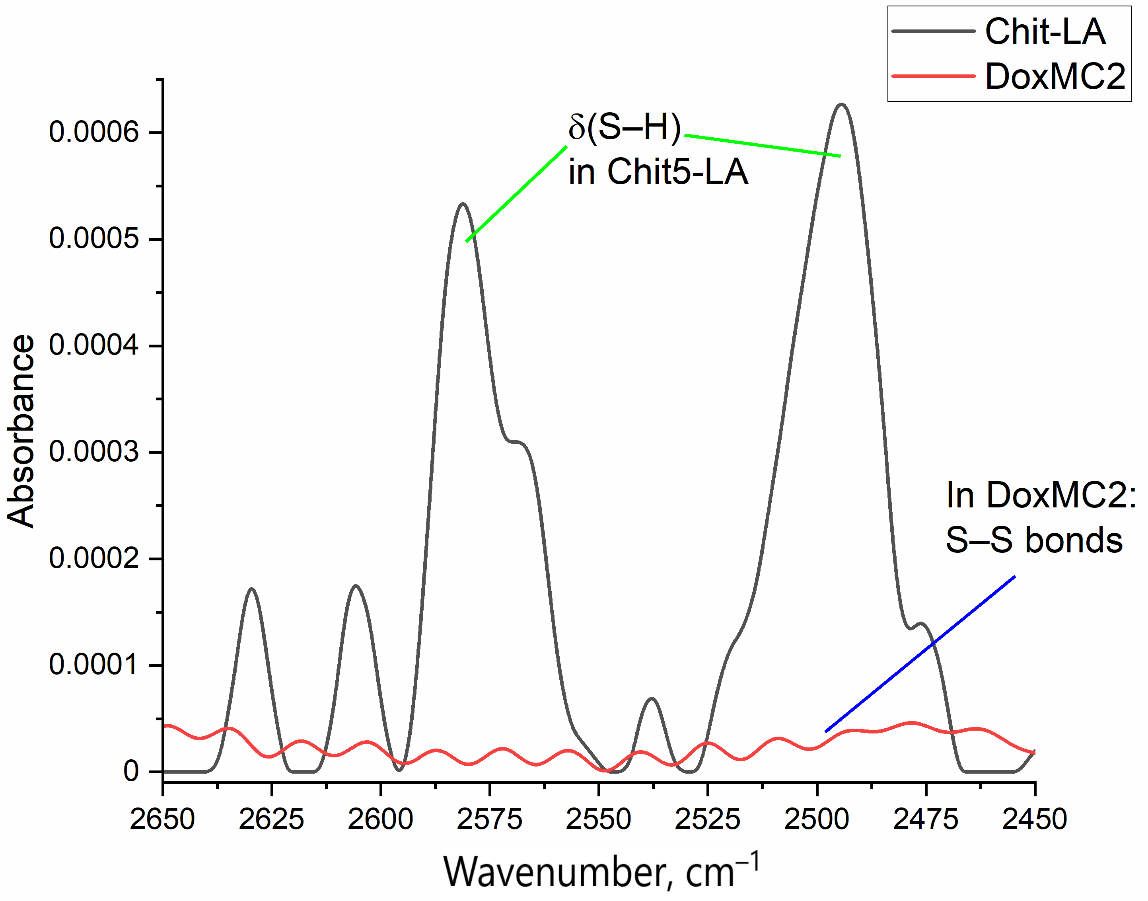


**Figure S3.** FTIR spectra of normal HEK293T cells during incubation for 30 min with free Dox (0.1 mg/mL) and micellar Dox formulation (DoxM1). PBS (0.01 M, pH = 7.4). T = 22 or 37 °C.


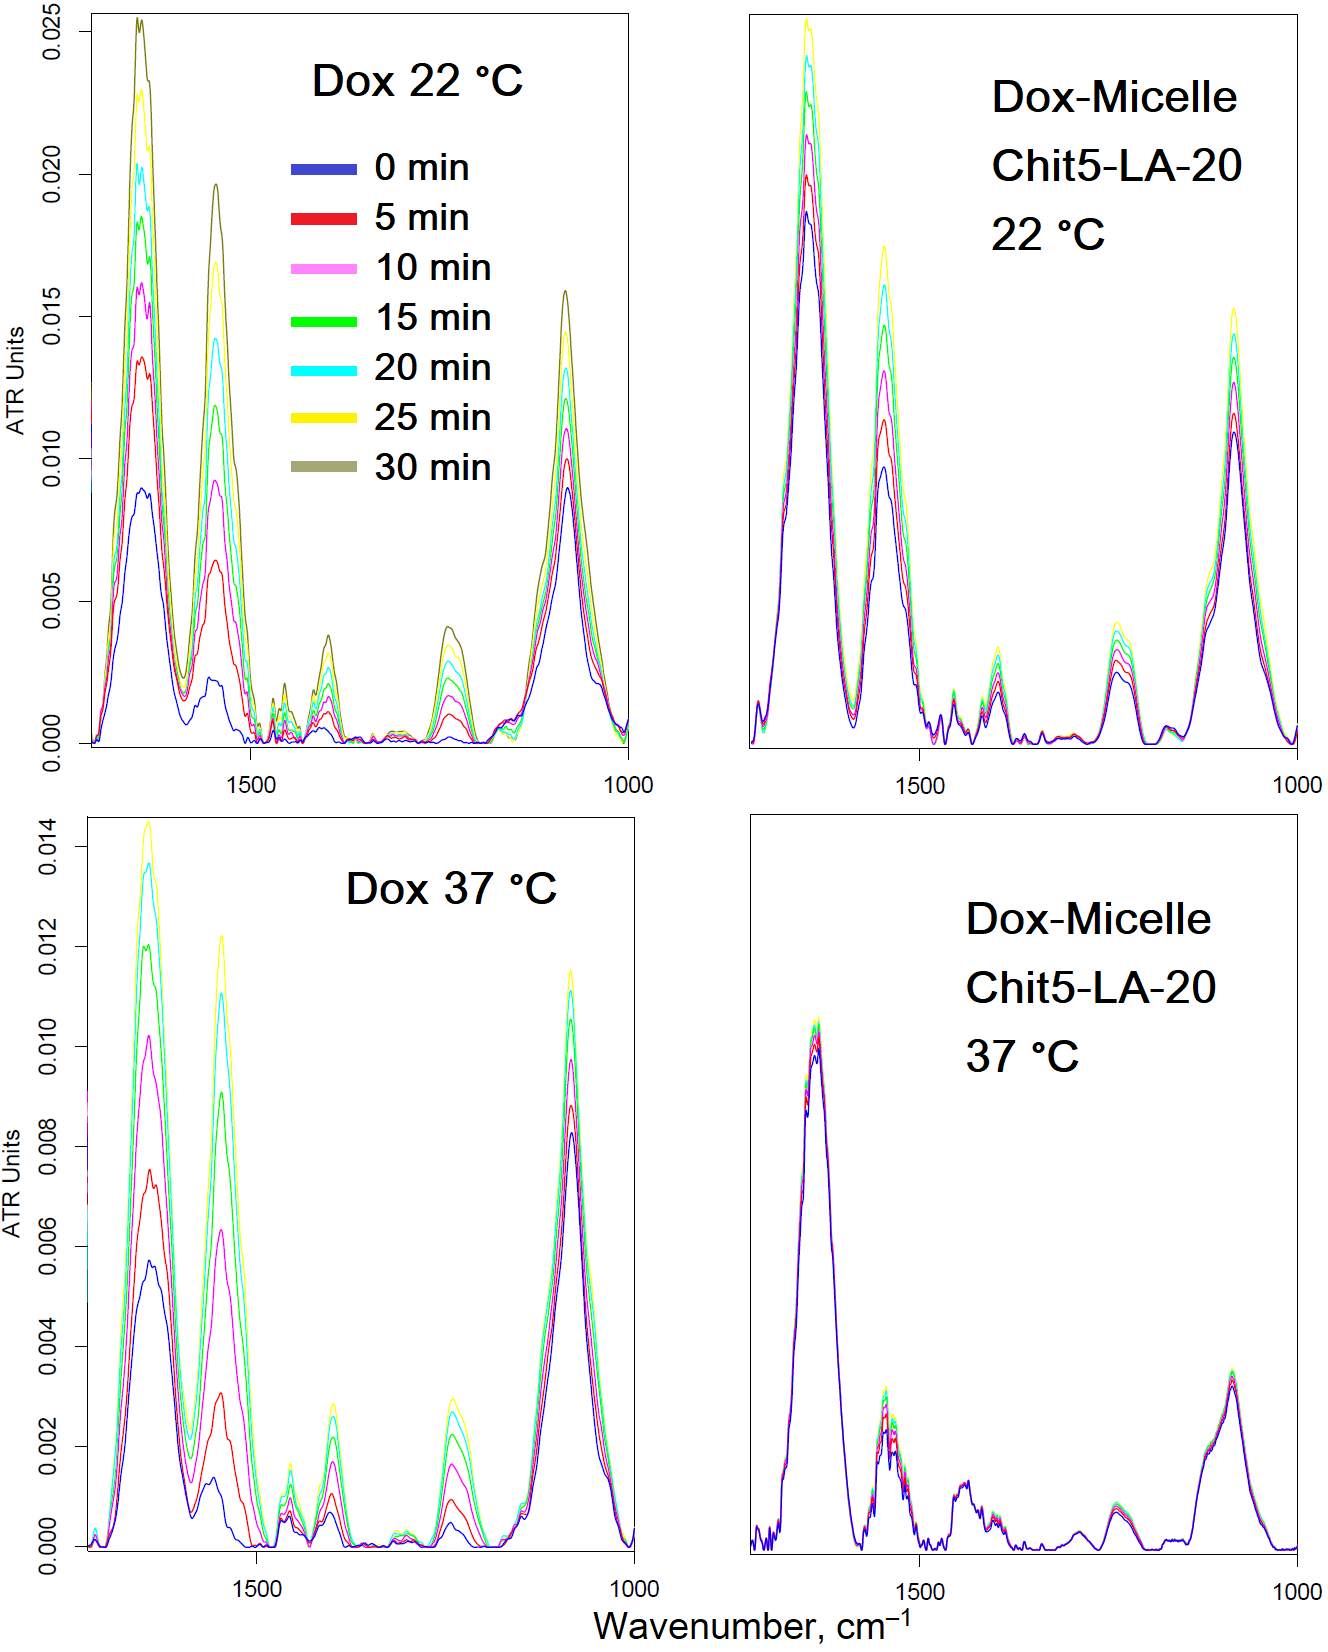


**Figure S4.** 1H NMR of Chit5 grafted with (a) lipoic acid and (b) oleic acid. PBS (0.01M, pH = 7.4). T = 22 °C.


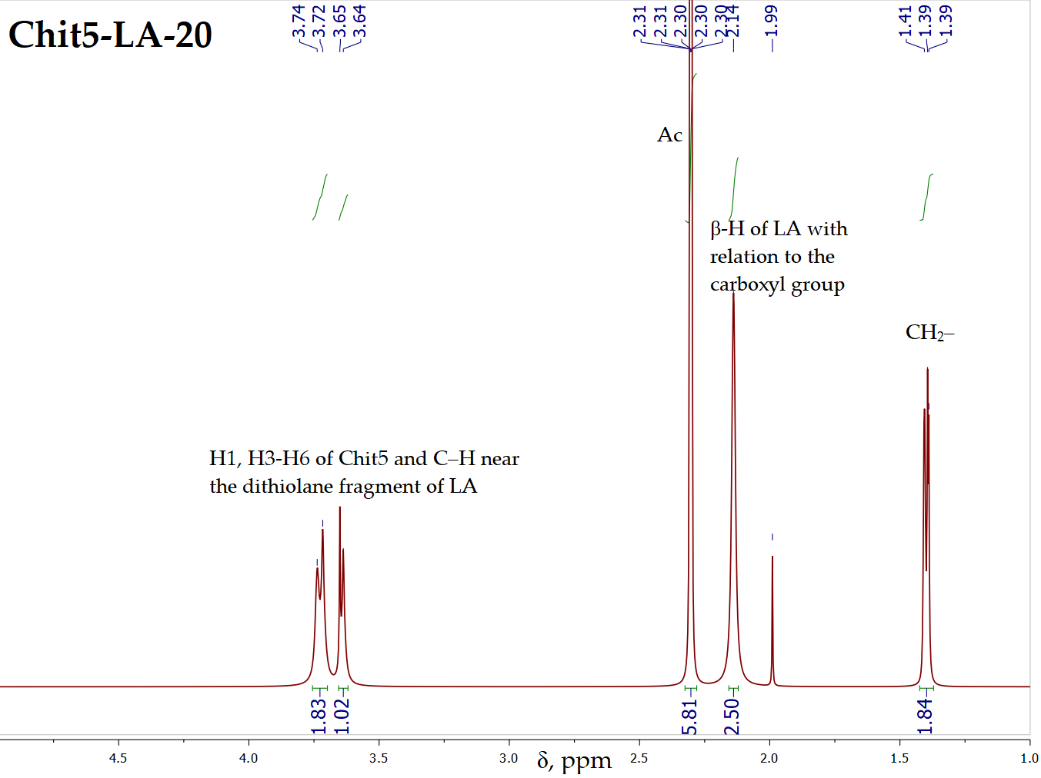


**(a)**


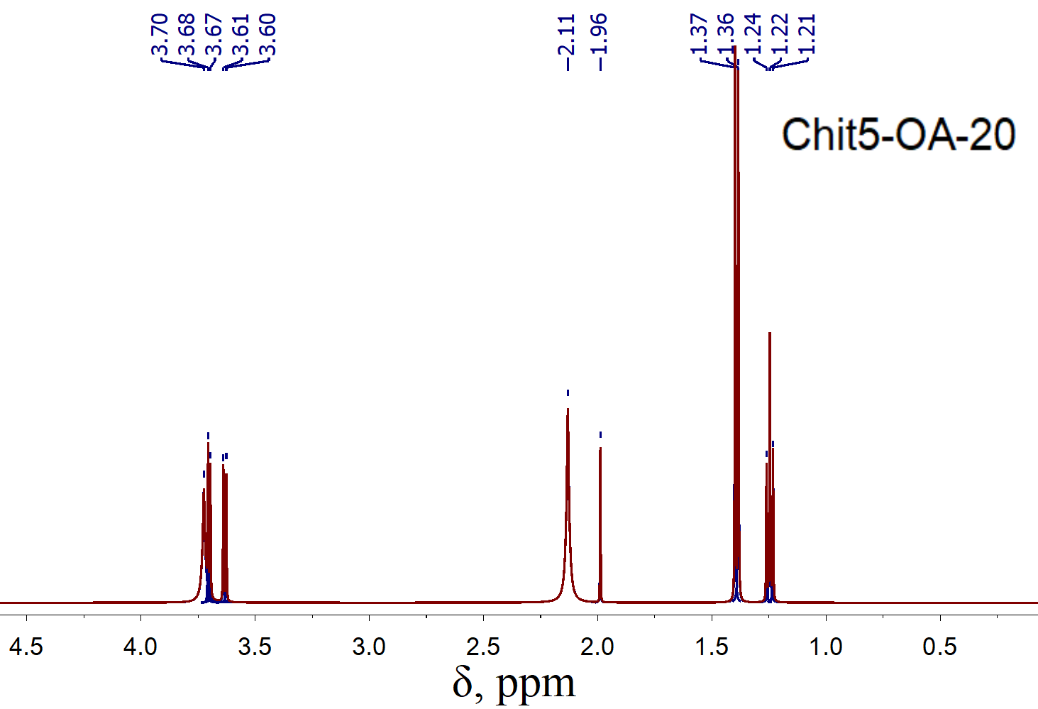


**(b)**
